# Supplementary material
Source: Springer Nature journal article supplement (https://www.springermedizin.de/resource/supplementary/13075_2013_4418_MOESM2_ESM.pdf/10110370)

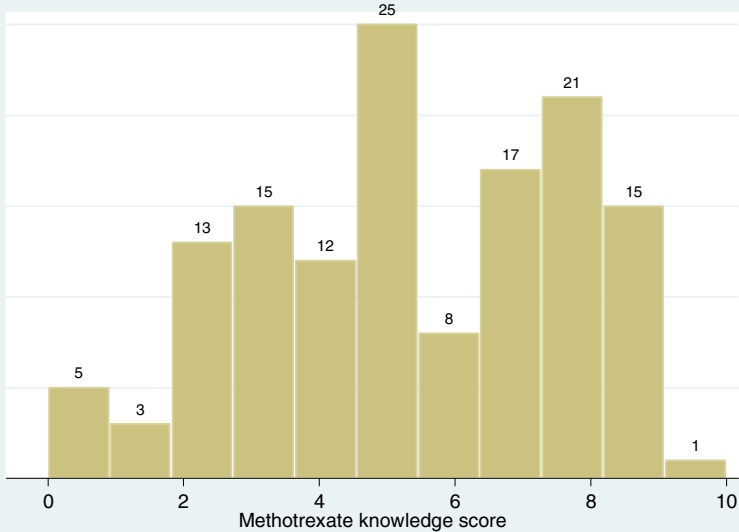

Supplement: MOESM2 [file 10110370]
